# Supplementary material
Source: PubMed Central journal article supplement (PMC11380567)
Supplement: NIHMS1962951-supplement-3.pdf [file NIHMS1962951-supplement-3.pdf]

**Fig. S2**

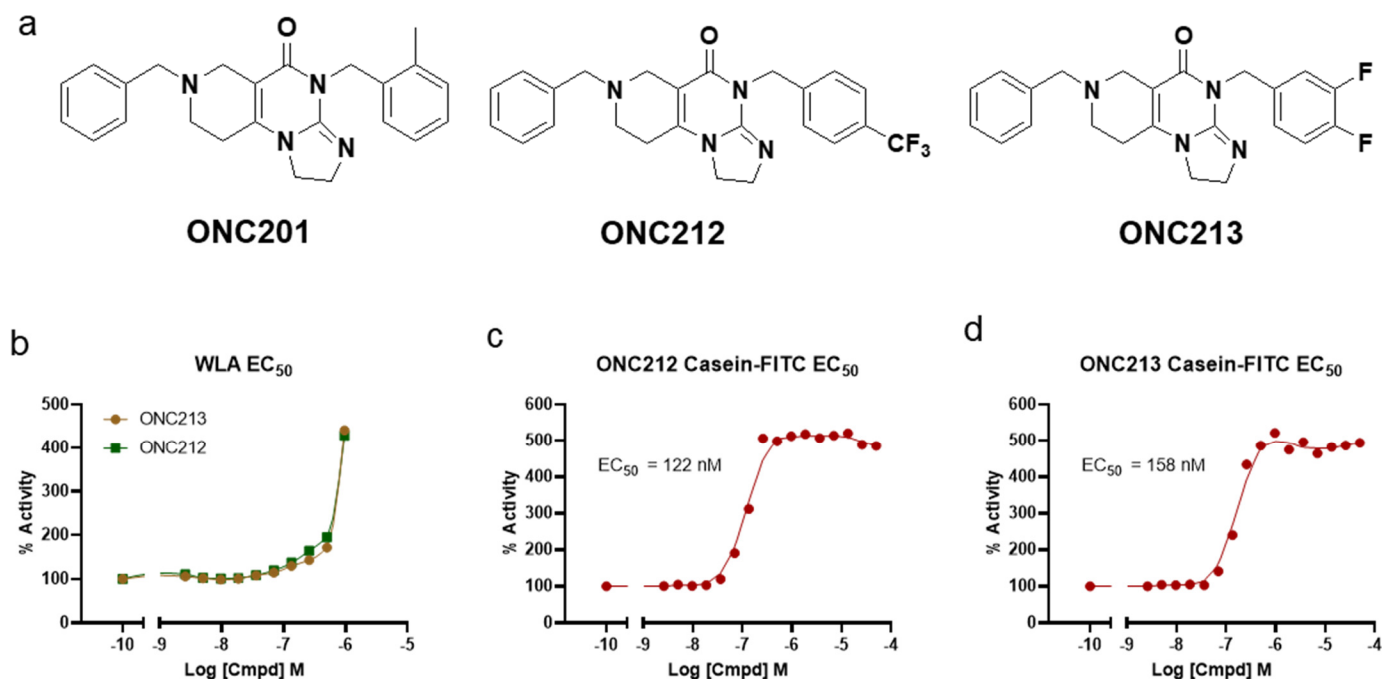

**Fig. S2. ONC213 activates CLPP.** **a.** Chemical structures of ONC201, ONC212, and ONC213. **b.** Biochemical Ac-WLA-AMC degradation with human CLPP (hCLPP) was performed in the absence or presence of ONC212 or ONC213. ONC212 – [Cmpd] at 200% activity = 521 nM, activity ratio = 4.3 (max/min); ONC213 – [Cmpd] at 200% activity = 558 nM, activity ratio = 4.4 (max/min). **c&d.** Biochemical Casein-FITC degradation assays with hCLPP were performed in the absence or presence of ONC212 or ONC213. ONC212 EC<sub>50</sub> = 122 nM; ONC213 EC<sub>50</sub> = 158 nM.
