# Supplementary material
Source: PubMed Central journal article supplement (PMC11380567)
Supplement: NIHMS1962951-supplement-4.pdf [file NIHMS1962951-supplement-4.pdf]

**Fig. S3**

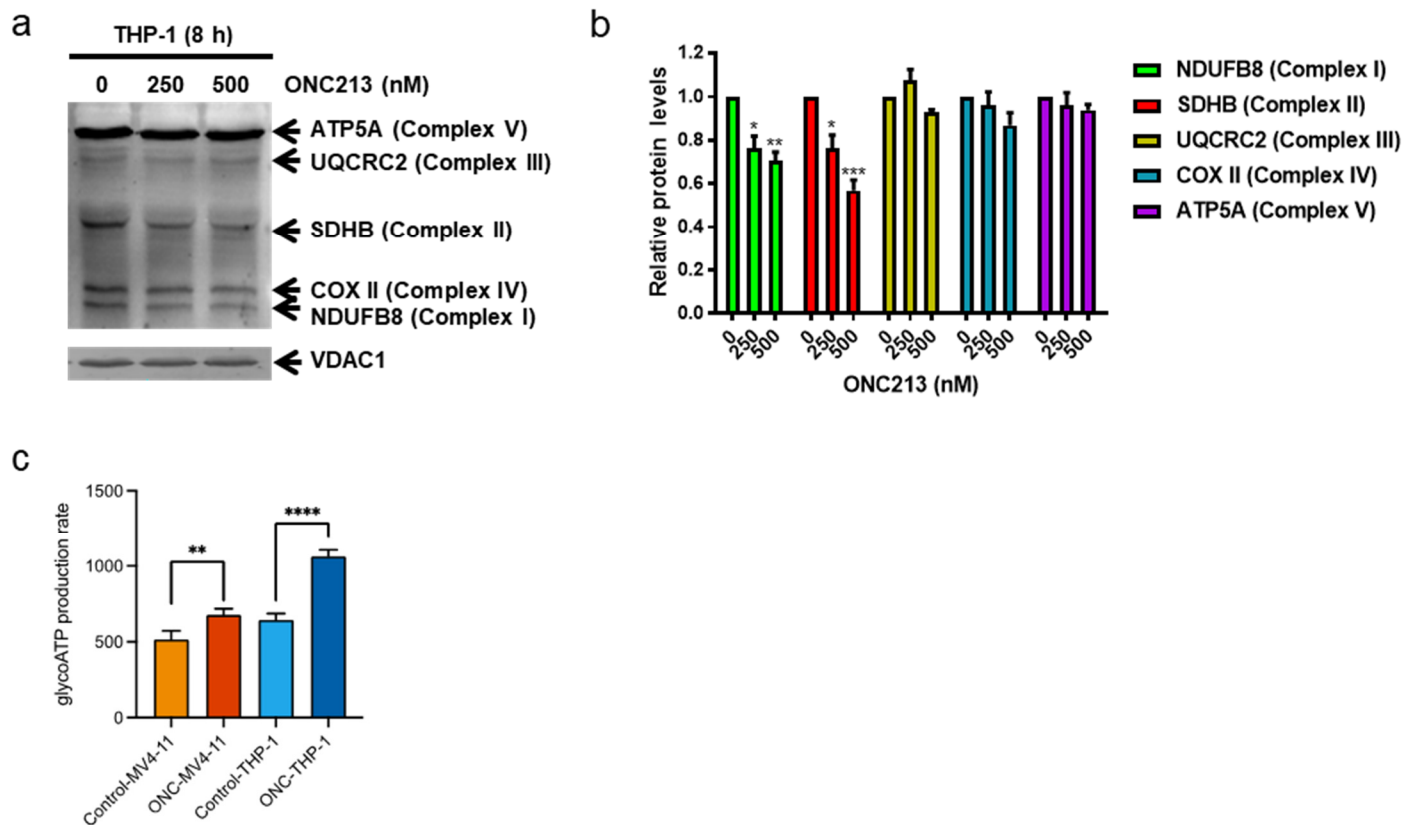

**Fig. S3. Electron transport chain and ONC213. a&b.** THP-1 cells were treated with vehicle or ONC213 at the indicated concentrations for 8 h. Protein lysates of mitochondrial extracts were analyzed by western blotting and probed with a human OXPHOS (oxidative phosphorylation) antibody cocktail [complex I, NDUFB8; complex II, SDHB; complex III, UQCRC2; complex IV, cytochrome *c* oxidase subunit II (COX II); and complex V, ATP synthase subunit alpha (ATP5A); panel a]. VDAC1 was used as a loading control. The fold changes for densitometry measurements, normalized to VDAC1 and then compared to vehicle control are graphed as mean  $\pm$  SEM from three independent experiments (panel b). \*  $P < 0.05$ ; \*\*  $P < 0.01$ ; \*\*\*  $P < 0.001$ . **c.** Levels of glycolytic ATP production in MV4-11 and THP-1 cells treated with either vehicle or ONC were assessed by Seahorse analyzer. \*\*\*\*  $p < 0.0001$ ; \*\*  $< 0.01$ .
