# Supplementary material
Source: PubMed Central journal article supplement (PMC11380567)
Supplement: NIHMS1962951-supplement-6.pdf [file NIHMS1962951-supplement-6.pdf]

**Fig. S5**

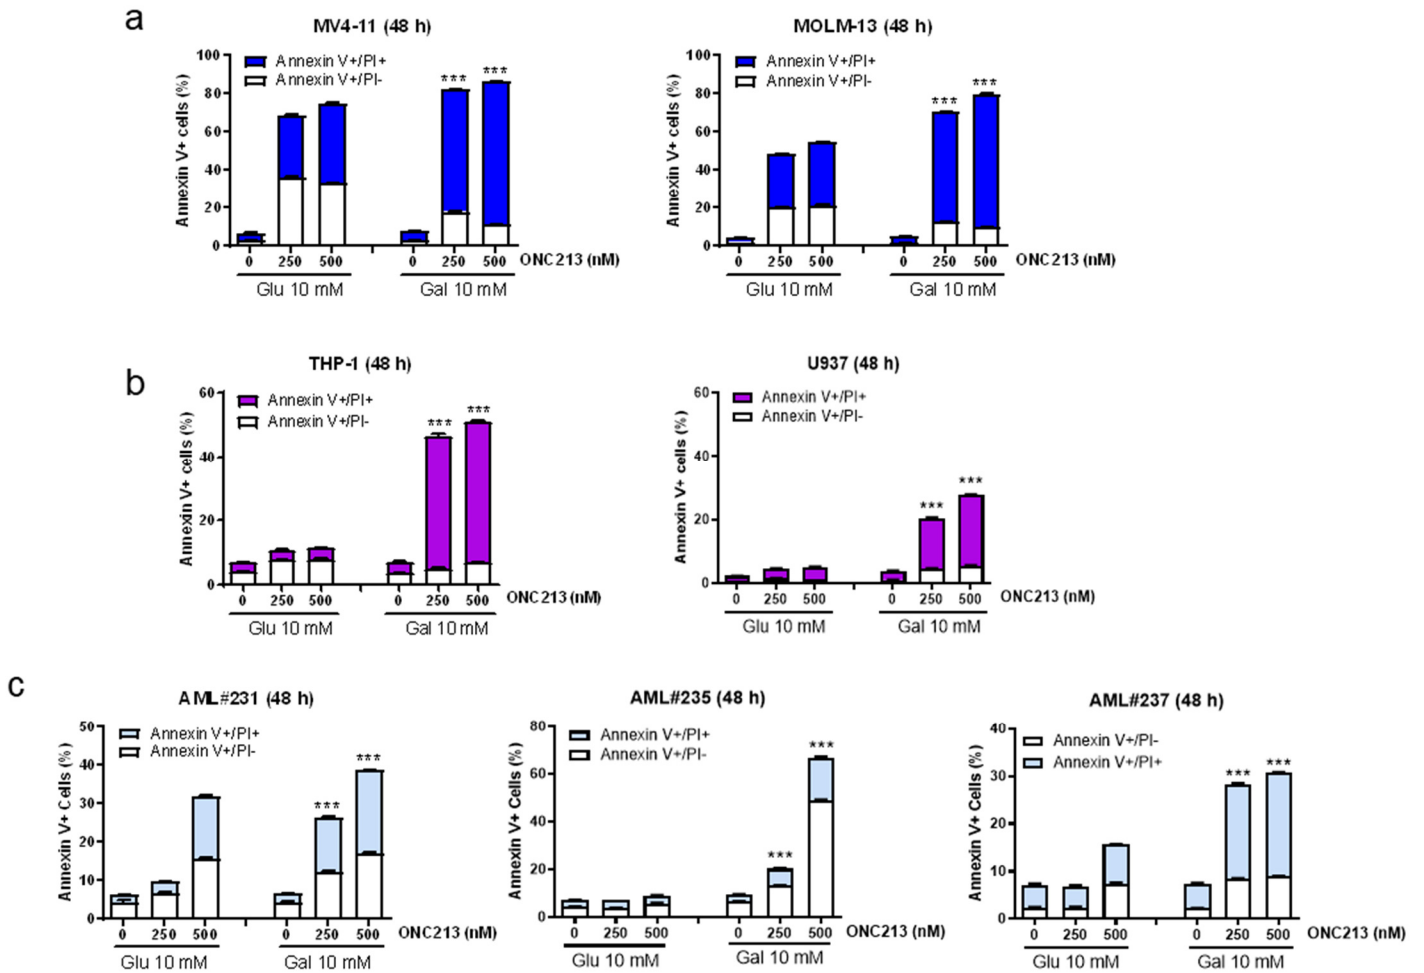

**Fig. S5. ONC213 treatment alters mitochondrial membrane potential with ONC213 sensitivity determined by reliance on OXPHOS. a-c.** MV4-11, MOLM-13, THP-1, and U937 AML cell lines and primary AML cells from patients (AML#231, AML#235, and AML#237), maintained in culture media supplemented with either glucose (Glu) or galactose (Gal), were treated with vehicle or ONC213 for 48 h and then analyzed by Annexin V-FITC/PI staining and flow cytometry analyses. \*\*\*  $P < 0.001$  compared to the same ONC213 treatment concentration in glucose media.
