# Supplementary material
Source: PubMed Central journal article supplement (PMC11380567)
Supplement: NIHMS1962951-supplement-7.pdf [file NIHMS1962951-supplement-7.pdf]

**Fig. S6**

**a**

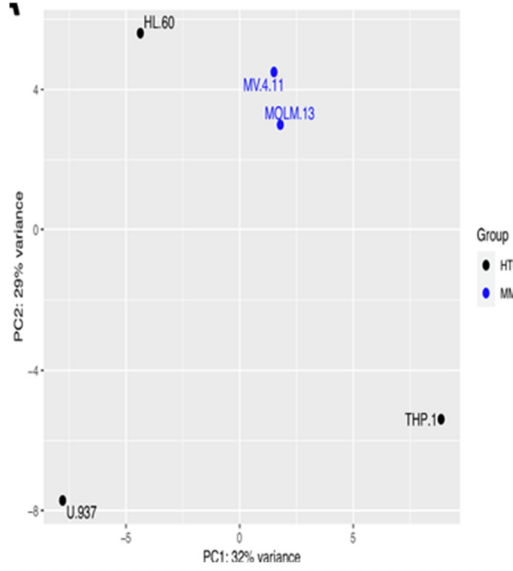

**b**

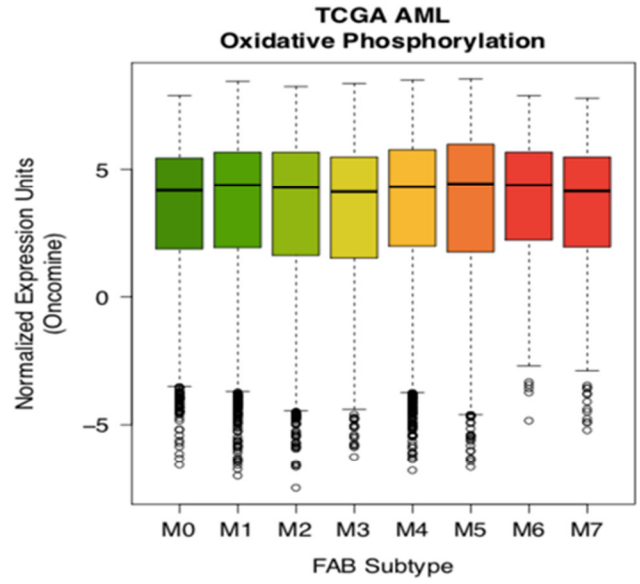

**c**

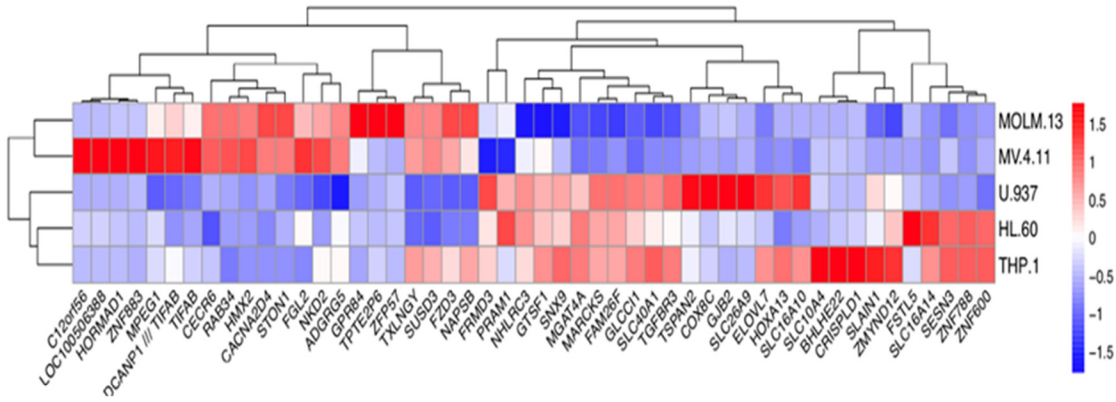

**d**

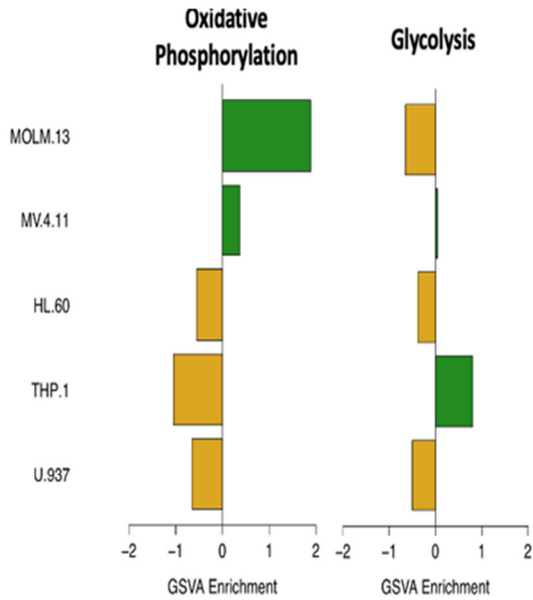

**e**

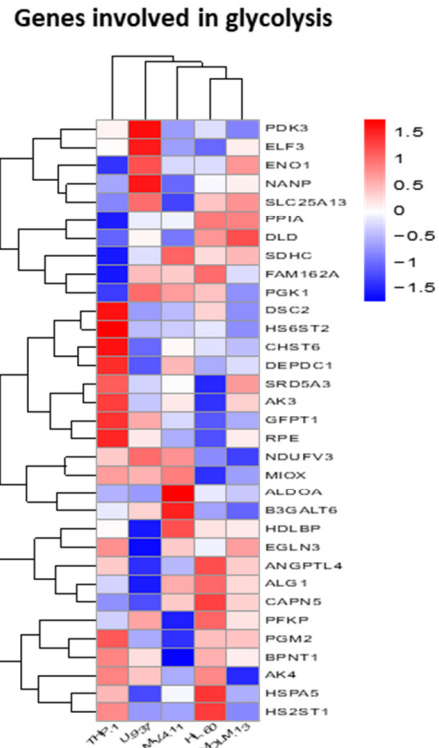

**Fig. S6. Inherent differences in AML cell line OXPPOS gene expression. a, c-e.** Gene expression datasets for MOLM-13, MV4-11, THP-1, HL-60, and U937 AML cell lines were recovered from the CCLE database ([www.broadinstitute.org/ccle](http://www.broadinstitute.org/ccle)). Expression levels were RMA normalized. Glycolytic and OXPPOS pathways were interrogated. PCA plot is shown in panel a. An unsupervised analysis of the top 50 most variable genes is shown as a heat map in panel c. Glycolysis and OXPPOS z-score-scaled gene set variation analysis enrichment scores are shown in panel d. Panel e shows the heat map of the glycolytic genes. **b.** Gene expression datasets for primary AML cells and TCGA (The Cancer Genome Atlas) data were recovered from the OncoPrint database. Levels of the OXPPOS gene set were assessed in different AML FAB subtypes (M0-M7).
