# Supplementary material
Source: PubMed Central journal article supplement (PMC11380567)
Supplement: NIHMS1962951-supplement-11.pdf [file NIHMS1962951-supplement-11.pdf]

**Table S1. Patient characteristics of primary AML patient samples**

| Patients | Gender | Age (year) | Disease status  | FAB subtype | Cytogenetics                   | Blast purity (%) | Gene mutation                            |
|----------|--------|------------|-----------------|-------------|--------------------------------|------------------|------------------------------------------|
| AML#136  | Female | 44         | Newly diagnosed | M2          | 46,XX(20)                      | 80               | CEBPA Double mutation                    |
| AML#137  | Female | 62         | Newly diagnosed | M2          | 45,X,-X,t(8;21)(q22;q22)       | 47               | RUNX1-RUNX1T1                            |
| AML#138  | Female | 46         | Relapsed        | M4          | 46,XX                          | 68.5             | NPM-1                                    |
| AML#139  | Female | 44         | Relapsed        | M5          | 46,XX                          | 84.5             | NPM-1, FLT3-ITD, IDH2, DNMT3A            |
| AML#140  | Female | 33         | Newly diagnosed | M3          | 46,XX,t(15;17)(q22;q21)        | 97.5             | PML-RAR $\alpha$                         |
| AML#141  | Female | 40         | Newly diagnosed | M5          | 46,XX                          | 39               | NA                                       |
| AML#142  | Female | 64         | Newly diagnosed | M2          | 46,XX                          | 53.5             | DNMT3A, PHF6, STAG2, TET2 mutation       |
| AML#143  | Male   | 72         | Newly diagnosed | M5          | 46,XY                          | 83.5             | DNMT3A, NPM1, NRAS, SF3B1, TET2 mutation |
| AML#144  | Female | 64         | Newly diagnosed | M4          | 46,XX                          | 20.5             | DNMT3A, FLT3-ITD, NPM1, TET2 mutation    |
| AML#145  | Male   | 41         | Newly diagnosed | M5          | 46,XY,t(6;11)(q27;q23)         | 88               | KRAS mutation                            |
| AML#146  | Female | 20         | Relapsed        | M2          | 46,XX                          | 62.5             | CEBPA Double mutation                    |
| AML#147  | Male   | 41         | Newly diagnosed | M2          | 46,XY,t(8;21)(q22;q22)         | 69               | TET2 mutation                            |
| AML#148  | Male   | 54         | Relapsed        | M5          | 46,XY                          | 93               | NPM1, FLT3-ITD, DNMT3A mutation          |
| AML#149  | Male   | 48         | Newly diagnosed | M4          | 46,XY                          | 55.5             | FLT3-ITD mutation                        |
| AML#150  | Male   | 48         | Newly diagnosed | M2          | 46,XY                          | 68               | CEBPAdm, IDH2                            |
| AML#151  | Male   | 26         | Newly diagnosed | M3          | 46,XY                          | 88               |                                          |
| AML#152  | Female | 49         | Newly diagnosed | M5          | 46,XX                          | 85               | DNMT3A, NPM1                             |
| AML#153  | Male   | 54         | Relapsed        | M2          | 46,XY                          | 29               | RUNX1, IDH2, DNMT3A                      |
| AML#154  | Female | 75         | Untreated       | M5          | NA                             | 37               |                                          |
| AML#155  | Male   | 68         | Newly diagnosed | M5          | 46,XY                          | 96.5             | FLT3-ITD, NPM1, DNMT3A                   |
| AML#156  | Female | 21         | Relapsed        | M3          | 46,XX                          | 88               |                                          |
| AML#157  | Male   | 59         | Newly diagnosed | M3          | 44,XY,-1,-12,add(16p),add(17q) | 95.5             | N-RAS, TET2, TP53                        |
| AML#158  | Male   | 53         | Relapsed        | M2          | NA                             | 98               | NA                                       |
| AML#166  | Male   | 57         | Newly diagnosed | M5          | 46,XY                          | 66               | DNMT3A, TET2, NPM-1                      |
| AML#170  | Female | 50         | Newly diagnosed | M4          | 46,XX,t(3;3)(q21;q26)          | 72               | SF3B1                                    |
| AML#171  | Female | 59         | Newly diagnosed | M2          | 47,XX,+8                       | 60.5             | FLT3-ITD, DNMT3A                         |
| AML#172  | Female | 54         | Newly diagnosed | M2          | 46,XX                          | 58.5             | CEBPAdm, IDH2, N-RAS                     |
| AML#173  | Female | 66         | Newly diagnosed | M2          | 46,XX                          | 89.5             | FLT3-ITD, DNMT3A                         |
| AML#174  | Female | 1          | Newly diagnosed | M1          | 46,XX                          | 87               |                                          |
| AML#175  | Male   | 4          | Newly diagnosed | M2          | 46,XY                          | 56.5             |                                          |
| AML#176  | Male   | 35         | Newly diagnosed | M2          | 46,XY                          | 85               | GATA2, c-Kit                             |
| AML#177  | Male   | 5          | Newly diagnosed | M2          | 46,XY                          | 90               | MLL-AF9                                  |

**Table S1 continued**

| Patients | Gender | Age (year) | Disease status  | FAB subtype | Cytogenetics                             | Blast purity (%) | Gene mutation                                            |
|----------|--------|------------|-----------------|-------------|------------------------------------------|------------------|----------------------------------------------------------|
| AML#180  | Male   | 68         | Relapsed        | M5          | 46,XY                                    | 96               | Flt3-ITD, NPM1, DNMT3A                                   |
| AML#181  | Female | 30         | Newly diagnosed | M4          | 46,XX                                    | 77.5             | Flt3-ITD, NPM1, IDH2, N-RAS                              |
| AML#182  | Female | 44         | Newly diagnosed | M2          | 45,X,-X,t(6;7)(q25;q22),t(8;21)(q22;q22) | 27               | MPL W515L                                                |
| AML#183  | Female | 47         | Relapsed        | M4          | 46,XX                                    | 88               | NPM1, DNMT3A, IDH2, PTPN11                               |
| AML#184  | Female | 12         | Newly diagnosed | M3          | 46,XX,t(15;17)(q22;q21)                  | 93.5             | PML/RARa                                                 |
| AML#185  | Female | 37         | Newly diagnosed | M2          | 46,XX                                    | 87.5             | FLT3-ITD, NPM1, IDH2                                     |
| AML#186  | Female | 41         | Newly diagnosed | M2          | 46,XX                                    | 30.5             | Flt3-ITD, NPM1, DNMT3A, TP53                             |
| AML#187  | Male   | 50         | Newly diagnosed | M4          | 47,XY,+8                                 | 96.5             | FLT3-ITD                                                 |
| AML#188  | Female | 55         | Newly diagnosed | M3          | 46,XX,t(15;17)(q22;q21)                  | 93               | FLT3-ITD, SH2B3                                          |
| AML#189  | Male   | 79         | Newly diagnosed | M5          | 46,XY                                    | 74.5             | ASXL1, RUNX1, CEBPAsm, TET2, SRSF2, STAT5B, CREBBP, PHF6 |
| AML#190  | Female | 51         | Newly diagnosed | M4          | NA                                       | 94               | NA                                                       |
| AML#192  | Female | 1          | Newly diagnosed | M4/M5       | 46,XX                                    | 29.5/17.5        |                                                          |
| AML#196  | Female | 40         | Newly diagnosed | M5          | 46,XX                                    | 98               | NPM-1, FLT3-ITD, DNMT3A                                  |
| AML#197  | Male   | 21         | Newly diagnosed | M2          | 46,XY,t(8;21)(q22;q22)                   | 37               | CSF3R, FLT3-ITD, TET-2                                   |
| AML#198  | Female | 44         | Newly diagnosed | M2          | 46,XX,t(8;21)(q22;q22)                   | 68               | ASXL1,K-RAS,N-RAS                                        |
| AML#199  | Female | 47         | Relapsed        | M4          | 46,XX                                    | 98               | NPM1, FLT3-ITD, IDH2                                     |
| AML#200  | Male   | 44         | Newly diagnosed | M2          | 46,XY                                    | 77               | CEBPAdm, FLT3-ITD                                        |
| AML#231  | Male   | 17         | Newly diagnosed |             | 46, XY, der(19)t(1;19)(q23;p13), +21[16] | 74               |                                                          |
| AML#235  | Female | 33         | Newly diagnosed | M4/M5       | 46, XX                                   | 87               | NPM1                                                     |
| AML#237  | Male   | 56         | Relapsed        |             |                                          | 88               |                                                          |
| AML#248  | Male   | 16         | Newly diagnosed | AML         | 45, X, -Y[20]                            | 79               | CEBPA, NRAS, PTPN11                                      |
| AML#250  | Male   | 44         | Newly diagnosed | M5          | 46,XY,add(9)(q34)[18]/46,XY[2]           | 85.5             | WT1, PRAME, ELANE, IDH2, SH2B3, TET2                     |
| AML#251  | Female | 67         | Newly diagnosed | AML         | 46, XX[20]                               | 87               | FLT3-ITD, ETNK1, ETV6, PTPN11, RUNX1, RUNX1              |
| AML#252  | Female | 39         | Newly diagnosed | M5          | 46, XX[10]                               | 97.5             | NA                                                       |
| AML#253  | Male   | 38         | Newly diagnosed | AML         | 46, XY[20]                               | 66.5             | CEBPA, KMT2C, PDGFRA                                     |
| AML#256  | Male   | 57         | Newly diagnosed | M4/M5       | 47,XY,+8[20]                             | 80.5             | MLL-PTD(+); DNMT3A, SH2B3, FLT3-TKD, TCF, RUNX1          |
