# Supplementary material
Source: PubMed Central journal article supplement (PMC11380567)
Supplement: NIHMS1962951-supplement-12.pdf [file NIHMS1962951-supplement-12.pdf]

**Table S2. Patient characteristics for AML cell lines**

| <b>Cell line</b> | <b>Age/Gender</b> | <b>FAB subtype</b> | <b>Disease status</b> | <b>Unique translocations/<br/>fusion gene</b>                   |
|------------------|-------------------|--------------------|-----------------------|-----------------------------------------------------------------|
| CTS              | 13 y/F            | AML M1             | At relapse            | t(6;11)(q27;q23)/MLL-AF6                                        |
| HL-60            | 35 y/F            | AML M3             | At diagnosis          | Does not carry<br>t(15;17)(q22;q11) nor<br>PML-RARA fusion gene |
| MOLM-13          | 20 y/M            | AML M5             | At relapse            | ins(11;9)(q23;p22p23)/MLL-<br>AF9                               |
| MV4-11           | 10 y/M            | AML M5             | At diagnosis          | t(4;11)(q21;q23)/MLL-AF4                                        |
| OCI-AML3         | 57 y/M            | AML M4             | At diagnosis          | None                                                            |
| THP-1            | 1 y/M             | AML M5             | At relapse            | t(9;11)(p21;q23)/MLL-AF9                                        |
| U937             | 37 y/M            | AML M5             | Refractory            | t(10;11)(p13;q14)/CALM-<br>AF10                                 |
| ML-2             | 26 y/M            | AML M4             | At diagnosis          | t(6;11)(q27;q23)/MLL-AF6                                        |
